# Supplementary material
Source: ML conference proceedings conference paper supplement (https://openaccess.thecvf.com/content/ICCV2025/html/Song_Normal_and_Abnormal_ICCV_2025_paper.html)
Supplement: Supplementary file 1 [file Song_Normal_and_Abnormal_ICCV_2025_supplemental.pdf]

# Supplementary Material for Normal and Abnormal Pathology Knowledge-Augmented Vision-Language Model for Anomaly Detection in Pathology Images

## 1. Detailed Experimental Setup

### 1.1. Pathology term pools

We present the pathology terms that we collected and used for lymph node metastasis detection in Tab. S1. The curated term pools consist of 92 normal terms and 48 abnormal terms.

### 1.2. Implementation details of competing models

Seven competing models are involved in this study. For GANomaly, STFPM, Fastflow, CFA, and EfficientAD, we followed the implementation of anomalib [2]. Based on the benchmark results, we selected the specific backbone architectures and implementation strategies. These models were trained for 1 epoch and evaluated on an NVIDIA RTX 3090 GPU. Detailed implementations settings are as follows:

**GANomaly.** We set the batch size to 100 for training. Following the original work [1], we adopted Adam optimizer with an initial learning rate of 0.0002 and momentum parameters  $\beta_1 = 0.5$ ,  $\beta_2 = 0.999$ . The size of the autoencoder latent vector was set to 100. The weights for the loss functions were set to  $w_{bce} = 1$ ,  $w_{rec} = 50$ , and  $w_{enc} = 1$ .

**STFPM.** The batch size was set to 100 for training. For the remaining settings, we followed the optimized configurations from the original work [9], utilizing the first three blocks of ResNet18 [4] as the feature extractor and Stochastic Gradient Descent optimizer with a learning rate of 0.4.

**Fastflow.** We set the batch size to 50 for training due to computational limitations. Following the optimized configurations provided in the original work [11], we set all other settings based on WideResNet50 [12]: Adam optimizer with a learning rate of 0.001 and weight decay of 0.00001, and 8-step flows.

**CFA.** We set the batch size to 50 for training because of computational limitations. For other settings, we followed the optimized configurations provided in the CFA [5] paper, based on the WideResNet50 [12] feature extractor: AdamW optimizer applied with amsgrad, a learning rate of 0.001 and weight decay of 0.0005, the number of nearest neighbors for each patch feature to 3, and  $\gamma_c$  and  $\gamma_d$  to 1.

**EfficientAD.** Following the original work [3], we adopted

EfficientAD-S and utilized Adam optimizer with a learning rate of 0.0001 and a weight decay of 0.00001, a batch size of 1, and 384 convolution output channels.

The remaining two models (AnoDDPM and AnomalyCLIP) are implemented as follows:

**AnoDDPM.** [10] We used the official implementation of AnoDDPM and adopted the training settings of AnoDDPM-PNDM [6]. Specifically, we employed 100 timesteps  $t \in [10, 20, 30, \dots, 990, 1000]$ , each representing a specific noise level in the denoising process, using the PNDM sampler [7]. The model was trained using Adam optimizer with a batch size of 28 for 1 million iterations (approximately 20 epochs). The optimal model was selected based on a signal-to-noise ratio (SNR) of 0.1, which showed the best performance on **Camelyon16** as reported in [6]. Evaluation was conducted on an NVIDIA RTX A6000 GPU.

**AnomalyCLIP.** [13] We employed the official implementation of AnomalyCLIP with CLIP(ViT-L/14) [8] as the backbone. The model was trained for one epoch with a batch size of 64. To tailor the approach to lymph node detection, the prompt learner was initialized with the class name "lymph node tissue". For the remaining settings, we followed the optimized configurations outlined in [13]. Specifically, we adopted Adam optimizer with a learning rate of 0.001. The number of learnable text prompts was set to 12. Trainable text tokens were attached to the first 9 layers of the text encoder. Each text token had a length of 4.

### 1.3. Computational efficiency evaluation

Latency and peak GPU memory usage were measured with a batch size of 28, and dummy iterations were performed beforehand to stabilize execution. GPU synchronization using `torch.cuda.synchronize` was applied before and after the inference to ensure accurate timing. Peak GPU memory usage was tracked with `torch.cuda.max_memory_reserved`, which records the highest reserved memory during inference.

|                                                                                               |                                                                             |                                                                                 |                                                                                                       |
|-----------------------------------------------------------------------------------------------|-----------------------------------------------------------------------------|---------------------------------------------------------------------------------|-------------------------------------------------------------------------------------------------------|
| <b>Normal terms</b>                                                                           | 36. Macrophages                                                             | 72. Prominent single nucleoli                                                   | 13. Microacinar architecture along its advancing edge                                                 |
| 1. Helper T lymphocyte                                                                        | 37. Plasmacytoid lymphocytes                                                | 73. Efferent vessels                                                            | 14. Tumor budding                                                                                     |
| 2. Small dormant lymphocytes                                                                  | 38. Capillaries                                                             | 74. Secondary lymphoid follicles                                                | 15. Large apocrine-like pleomorphic cells with large nuclei and prominent nucleoli                    |
| 3. Large B lymphocytes                                                                        | 39. Plasmablasts                                                            | 75. Primary follicle                                                            | 16. Discohesive cells                                                                                 |
| 4. Littoral cells                                                                             | 40. Distinct cytoplasmic boundaries                                         | 76. Frequent mitotic figures                                                    | 17. Isolated or small clusters of malignant cells in the stroma                                       |
| 5. Large and small cleaved follicular center cells scant cytoplasm and Inconspicuous nucleoli | 41. Follicle                                                                | 77. Mature T cells                                                              | 18. Glands with cells that have nuclear pseudostratification                                          |
| 6. Sclerosis in an inguinal lymph node                                                        | 42. Histiocytes                                                             | 78. Trabeculae                                                                  | 19. Cuboidal cells with eosinophilic cytoplasm and central nucleus                                    |
| 7. Sinuses                                                                                    | 43. Small B and T lymphocytes                                               | 79. B cells                                                                     | 20. Thickened capsule                                                                                 |
| 8. Marginal zone                                                                              | 44. Tightly packed anastomosing networks                                    | 80. Memory B cells                                                              | 21. Central luminal spaces of some small glands are filled by tumor cells producing small solid areas |
| 9. Large B cells scattered throughout the paracortex                                          | 45. Recirculating cells                                                     | 81. Arterioles                                                                  | 22. Caseous necrosis                                                                                  |
| 10. Germinal center                                                                           | 46. Abundant cytoplasm with medium to large nuclei with vesicular chromatin | 82. Cells are elongated and resemble fibroblasts                                | 23. Sinusoidal permeation                                                                             |
| 11. Squamous endothelium                                                                      | 47. Paracortex                                                              | 83. Coarse network of reticulin fibers                                          | 24. Microacinar structures                                                                            |
| 12. Interdigitating dendritic cells                                                           | 48. Faintly granular cytoplasm                                              | 84. Postfollicular memory B cells                                               | 25. Medium to small glands have an internal structure formed by microacini                            |
| 13. Histiocytes and high endothelial venules                                                  | 49. Distinct group of non T and non B lymphocytes                           | 85. Lymphatic vessels                                                           | 26. Epithelioid cell clusters                                                                         |
| 14. Lymphocytes                                                                               | 50. Subcapsular sinus                                                       | 86. T lymphocytes                                                               | 27. Glandular arrangement                                                                             |
| 15. Large round nuclei                                                                        | 51. Afferent lymph vessels                                                  | 87. T cells                                                                     | 28. Sinus involvement                                                                                 |
| 16. Circulatory monocytes                                                                     | 52. Capsule                                                                 | 88. Plasmacytoid dendritic cells                                                | 29. Small solid clusters or buds of tumor cells                                                       |
| 17. Lymphatic artery                                                                          | 53. Trabecular sinuses                                                      | 89. Cortex                                                                      | 30. Irregularly folded, distorted, and small tubules                                                  |
| 18. Discontinuous endothelium                                                                 | 54. Open chromatin                                                          | 90. B-cell-rich non-Germinal center                                             | 31. Comedo, trabecular and papillary patterns                                                         |
| 19. Smooth muscle                                                                             | 55. B immunoblasts                                                          | 91. Helper T cells                                                              | 32. Advancing edge of the adenocarcinomas                                                             |
| 20. Small unchallenged B cells                                                                | 56. Follicles                                                               | 92. Medulla                                                                     | 33. Single and small clusters of undifferentiated cells are admixed                                   |
| 21. Medullary sinuses                                                                         | 57. Tingible body macrophages                                               |                                                                                 | 34. May expand sinuses                                                                                |
| 22. Basophilic cytoplasm                                                                      | 58. Smooth muscle proliferation in lymph node hilum                         |                                                                                 | 35. Glandular structure is completely or almost completely lost                                       |
| 23. Erythrocytes                                                                              | 59. Large pale nuclei                                                       | <b>Abnormal terms</b>                                                           | 36. Paracortical expansion                                                                            |
| 24. Centrocytes                                                                               | 60. Plasma cells                                                            | 1. Tumor buds that emerge from medium-sized tubules                             | 37. Cells grow predominantly in solid masses or cords                                                 |
| 25. Tingible body macrophages contain apoptotic bodies                                        | 61. Straight branches                                                       | 2. Completely destroyed sinus architecture                                      | 38. Glands acquire a haphazard arrangement with marked variation in size, shape, and outline          |
| 26. Endothelial cell                                                                          | 62. Blood vessel                                                            | 3. Cells are discontinuous from the more superficial malignant glands           | 39. Cytokeratin                                                                                       |
| 27. Peripheral nucleoli                                                                       | 63. Medullary cords, sinuses and vessel                                     | 4. Small isolated round tubules within the stroma                               | 40. Complex, irregular, cribriform glands and small solid areas                                       |
| 28. Cortical sinus                                                                            | 64. Abundant basophilic cytoplasm                                           | 5. Balloon cell variant resembles histiocytes although nuclei are atypical      | 41. Apoptosis                                                                                         |
| 29. Mantle zone                                                                               | 65. Primary follicles                                                       | 6. Partially destroyed sinus architecture                                       | 42. Large apocrine-like pleomorphic cells with pink, granular cytoplasm                               |
| 30. Follicular dendritic cells                                                                | 66. Intranodal vessels                                                      | 7. Cytoplasmic mucin                                                            | 43. Glands are loosely and irregularly arranged                                                       |
| 31. Plasma cell-rich Germinal center                                                          | 67. Lymphoid nodules                                                        | 8. Small tubules that formed cribriform structures within medium or large gland | 44. Complex or simple tubules with a compact glandular structure                                      |
| 32. Large noncleaved follicular center cells                                                  | 68. Centroblasts                                                            | 9. Undifferentiated cells                                                       | 45. Grade 3 adenocarcinoma                                                                            |
| 33. Immunoblasts                                                                              | 69. Quiescent B cells                                                       | 10. Diffuse growth pattern                                                      | 46. Glands are lined by 3 or more layers                                                              |
| 34. Mast cells                                                                                | 70. Thin connective tissue capsule                                          | 11. Glands are small, round, and microacinar                                    | 47. Large, highly irregular glands that frequently have outpouchings and microacinar forms            |
| 35. Dense connective tissue                                                                   | 71. Tingible body macrophages have clear cytoplasm                          | 12. Nodular growth pattern                                                      | 48. Acini are lined by 2 or 3 layers of cells with basally oriented nuclei                            |

Table S1. Pathology terms in the curated term pools.

| Method                      | CONCH-class                       | CONCH-pool             | CONCH(v <sup>l</sup> ) | Ano-NAViLa                    |
|-----------------------------|-----------------------------------|------------------------|------------------------|-------------------------------|
| GastrielN                   | AUROC<br>( $A_{score}^{max}$ )    | 0.9068<br>[0.85, 0.96] | 0.7619<br>[0.67, 0.85] | 0.9902<br>[0.97, 1.00]        |
|                             | AUPR<br>( $A_{score}^{max}$ )     | 0.8987<br>[0.81, 0.96] | 0.6902<br>[0.57, 0.82] | 0.9922<br>[0.98, 1.00]        |
|                             | AUROC<br>( $A_{score}^{top1\%}$ ) | 0.8896<br>[0.82, 0.95] | 0.7166<br>[0.61, 0.81] | 0.9828<br>[0.96, 1.00]        |
|                             | AUPR<br>( $A_{score}^{top1\%}$ )  | 0.8607<br>[0.74, 0.95] | 0.6107<br>[0.49, 0.76] | 0.9844<br>[0.96, 1.00]        |
|                             | Patch<br>(AUROC)                  | 0.8942<br>[0.89, 0.90] | 0.8300<br>[0.83, 0.83] | 0.9651<br>[0.96, 0.97]        |
|                             |                                   |                        |                        | <b>0.9681</b><br>[0.97, 0.97] |
| Camelyon16                  | AUROC<br>( $A_{score}^{max}$ )    | 0.7459<br>[0.66, 0.83] | 0.5805<br>[0.48, 0.68] | 0.7857<br>[0.70, 0.86]        |
|                             | AUPR<br>( $A_{score}^{max}$ )     | 0.6762<br>[0.54, 0.80] | 0.4257<br>[0.32, 0.57] | 0.6844<br>[0.54, 0.80]        |
|                             | AUROC<br>( $A_{score}^{top1\%}$ ) | 0.7681<br>[0.67, 0.85] | 0.5135<br>[0.41, 0.61] | <b>0.7898</b><br>[0.70, 0.87] |
|                             | AUPR<br>( $A_{score}^{top1\%}$ )  | 0.7338<br>[0.61, 0.84] | 0.3837<br>[0.28, 0.50] | 0.7569<br>[0.64, 0.85]        |
|                             |                                   |                        |                        | <b>0.7941</b><br>[0.69, 0.87] |
|                             |                                   |                        |                        |                               |
| Camelyon16 <sub>macro</sub> | AUROC<br>( $A_{score}^{max}$ )    | 0.8358<br>[0.74, 0.92] | 0.6338<br>[0.49, 0.77] | 0.8940<br>[0.82, 0.95]        |
|                             | AUPR<br>( $A_{score}^{max}$ )     | 0.6255<br>[0.39, 0.81] | 0.3114<br>[0.18, 0.51] | 0.6931<br>[0.47, 0.86]        |
|                             | AUROC<br>( $A_{score}^{top1\%}$ ) | 0.9000<br>[0.80, 0.97] | 0.5051<br>[0.37, 0.64] | 0.9557<br>[0.90, 0.99]        |
|                             | AUPR<br>( $A_{score}^{top1\%}$ )  | 0.7821<br>[0.59, 0.91] | 0.2256<br>[0.13, 0.36] | 0.8847<br>[0.74, 0.98]        |
|                             |                                   |                        |                        | <b>0.9699</b><br>[0.89, 1.00] |
|                             |                                   |                        |                        |                               |

Table S2. AD performance compared to the VLM baseline.

## 2. Additional Experiments and Analyses

### 2.1. AD performance of baseline VLM

To compare Ano-NAViLa and the zero-shot performance of the VLM, we employed CONCH in its original form to conduct AD using the text prompt "an image showing KEYWORD" by replacing KEYWORD with 1) CONCH-class: either normal or metastasis lymph node, and 2) CONCH-pool: each of normal and abnormal terms in the pool. Both variants obtained substantially lower performance than Ano-NAViLa (Tab. S2). These results suggest that while the performance gain can be partially attributed to the use of CONCH, the strong performance, particularly on **Camelyon16**, is largely due to the proposed text-augmented embeddings.

### 2.2. AD performance without erosion operation

We repeated the experiments without the 3x3 erosion operation. The result are illustrated in Tab. S3. The performance of Ano-NAViLa were less sensitive to the erosion operation than other competing models. Ano-NAViLa outperformed others for all metrics except AUROC using  $A_{score}^{top1\%}$  on **Camelyon16**. For this metric, CFA achieved the best performance, followed by STFPM. Ano-NAViLa ranked third with an AUROC of 0.8092. Nevertheless, Ano-NAViLa obtained a higher AUROC of 0.8543 using  $A_{score}^{max}$ , surpassing CFA, which achieved 0.8176 AUROC using  $A_{score}^{top1\%}$ .

### 2.3. Anomaly localization

In Fig. S1, we provide additional heatmap visualizations of WSI-level AD results from abnormal WSIs in **Came-**

**lyon16**. The visualizations include heatmaps from the ground truth, Ano-NAViLa, and STFPM, achieving the second-best performance in AD and localization.

### 2.4. Distribution of image-text similarities

Fig. S2 and Fig. S3 show the distribution of image-text similarities in the normal and abnormal term pool, respectively. The numbers on the x-axis correspond to the indices of the pathology terms in Tab. S1. For (a) and (b) in both Fig. S2 and Fig. S3, we calculated the similarity scores of the normal or abnormal-labeled patches of each dataset and the pathology terms in each pool. For (c) and (d), we analyzed the representative patches (the patches with the highest anomaly scores in the WSIs) of normal or abnormal WSIs in each dataset. We averaged the similarity scores by dataset and label, and then visualized the distributions. The results reveal clear differences in similarity distributions between normal and abnormal images when combined with the normal and abnormal term pools, indicating strong discriminative alignment between image features and pathology-specific textual descriptions.

## References

- [1] Samet Akcay, Amir Atapour-Abarghouei, and Toby P. Breckon. Ganomaly: Semi-supervised anomaly detection via adversarial training. In *Computer Vision – ACCV 2018*, pages 622–637, 2019. 1
- [2] Samet Akcay, Dick Ameln, Ashwin Vaidya, Barath Lakshmanan, Nilesh Ahuja, and Utku Genc. Anomalib: A deep learning library for anomaly detection. In *2022 IEEE International Conference on Image Processing (ICIP)*, pages 1706–1710. IEEE, 2022. 1
- [3] Kilian Batzner, Lars Heckler, and Rebecca König. Efficientad: Accurate visual anomaly detection at millisecond-level latencies. In *Proceedings of the IEEE/CVF Winter Conference on Applications of Computer Vision*, pages 128–138, 2024. 1
- [4] Kaiming He, Xiangyu Zhang, Shaoqing Ren, and Jian Sun. Deep residual learning for image recognition. In *Proceedings of the IEEE conference on computer vision and pattern recognition*, pages 770–778, 2016. 1
- [5] Sungwook Lee, Seunghyun Lee, and Byung Cheol Song. Cfa: Coupled-hypersphere-based feature adaptation for target-oriented anomaly localization. *IEEE Access*, 10: 78446–78454, 2022. 1
- [6] Jasper Linmans, Gabriel Raya, Jeroen van der Laak, and Geert Litjens. Diffusion models for out-of-distribution detection in digital pathology. *Medical Image Analysis*, 93: 103088, 2024. 1
- [7] Luping Liu, Yi Ren, Zhijie Lin, and Zhou Zhao. Pseudo numerical methods for diffusion models on manifolds. In *International Conference on Learning Representations*, 2022. 1
- [8] Alec Radford, Jong Wook Kim, Chris Hallacy, Aditya Ramesh, Gabriel Goh, Sandhini Agarwal, Girish Sastry,

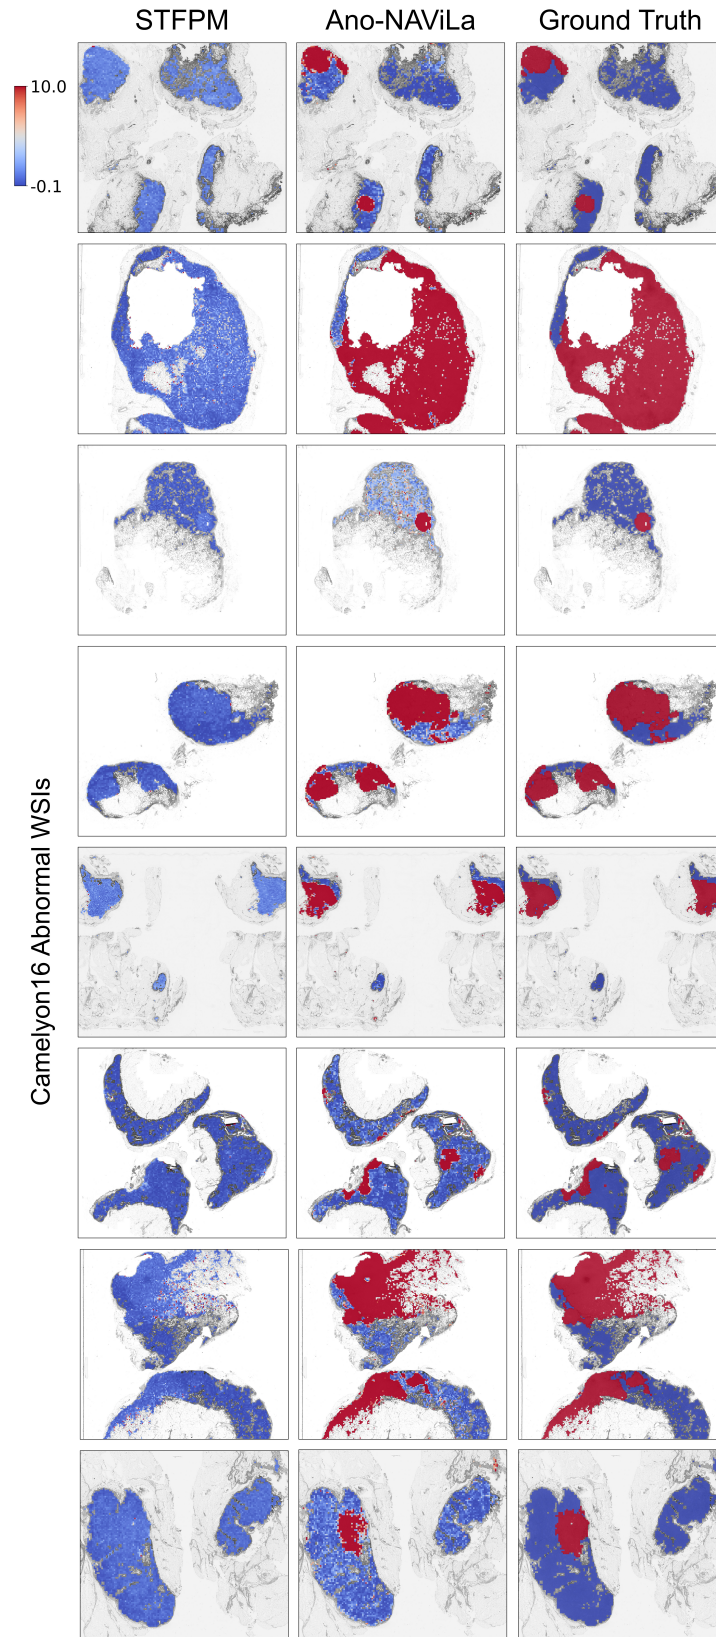

Figure S1. Visualization of anomaly localization in abnormal WSIs from Camelyon16.



| Method      | GastricLN (WSI)                |                               |                                   |                                  | Patch                         | Camelyon16                     |                               |                                       |                                  | Camelyon16 <sub>macro</sub>    |                               |                                   |                                  |
|-------------|--------------------------------|-------------------------------|-----------------------------------|----------------------------------|-------------------------------|--------------------------------|-------------------------------|---------------------------------------|----------------------------------|--------------------------------|-------------------------------|-----------------------------------|----------------------------------|
|             | AUROC<br>( $A_{score}^{max}$ ) | AUPR<br>( $A_{score}^{max}$ ) | AUROC<br>( $A_{score}^{top1\%}$ ) | AUPR<br>( $A_{score}^{top1\%}$ ) | AUROC                         | AUROC<br>( $A_{score}^{max}$ ) | AUPR<br>( $A_{score}^{max}$ ) | AUROC<br>( $A_{score}^{top1\%}$ )     | AUPR<br>( $A_{score}^{top1\%}$ ) | AUROC<br>( $A_{score}^{max}$ ) | AUPR<br>( $A_{score}^{max}$ ) | AUROC<br>( $A_{score}^{top1\%}$ ) | AUPR<br>( $A_{score}^{top1\%}$ ) |
| GANomaly    | 0.4153<br>[0.31, 0.52]         | 0.4769<br>[0.36, 0.61]        | 0.3143<br>[0.22, 0.42]            | 0.4129<br>[0.31, 0.52]           | 0.4182<br>[0.42, 0.42]        | 0.5717<br>[0.47, 0.67]         | 0.4962<br>[0.35, 0.63]        | 0.5827<br>[0.48, 0.68]                | 0.4713<br>[0.34, 0.61]           | 0.6193<br>[0.48, 0.75]         | 0.3535<br>[0.18, 0.54]        | 0.6091<br>[0.48, 0.73]            | 0.3348<br>[0.18, 0.52]           |
| STFPM       | 0.9410<br>[0.88, 0.99]         | 0.8855<br>[0.78, 0.98]        | 0.9940<br>[0.98, 1.00]            | 0.9926<br>[0.98, 1.00]           | 0.9538<br>[0.95, 0.96]        | 0.7398<br>[0.65, 0.82]         | 0.5568<br>[0.43, 0.72]        | 0.7954<br>[0.71, 0.88]                | 0.6914<br>[0.55, 0.85]           | 0.7665<br>[0.67, 0.85]         | 0.3544<br>[0.22, 0.57]        | 0.8250<br>[0.71, 0.92]            | 0.5584<br>[0.35, 0.82]           |
| FastFlow    | 0.9525<br>[0.90, 0.99]         | 0.9175<br>[0.81, 0.99]        | 0.9758<br>[0.94, 1.00]            | 0.9320<br>[0.82, 1.00]           | 0.9242<br>[0.92, 0.93]        | 0.7814<br>[0.70, 0.86]         | 0.6628<br>[0.51, 0.80]        | 0.8120<br>[0.73, 0.89]                | 0.7371<br>[0.61, 0.85]           | 0.8472<br>[0.75, 0.93]         | 0.5980<br>[0.38, 0.81]        | 0.8676<br>[0.76, 0.95]            | 0.7014<br>[0.48, 0.89]           |
| CFA         | 0.9598<br>[0.91, 1.00]         | 0.8898<br>[0.77, 1.00]        | 0.9828<br>[0.94, 1.00]            | 0.9274<br>[0.82, 1.00]           | 0.8881<br>[0.89, 0.89]        | 0.8306<br>[0.75, 0.91]         | 0.7667<br>[0.64, 0.87]        | <b>0.8176</b><br>[0.73, <b>0.89</b> ] | 0.7774<br>[0.66, 0.87]           | 0.9034<br>[0.81, 0.97]         | 0.7603<br>[0.56, 0.91]        | 0.8898<br>[0.78, 0.97]            | 0.7915<br>[0.62, 0.92]           |
| AnoDDPM     | 0.7816<br>[0.69, 0.86]         | 0.7200<br>[0.60, 0.85]        | 0.8454<br>[0.77, 0.91]            | 0.8415<br>[0.75, 0.92]           | 0.8860<br>[0.88, 0.89]        | 0.5311<br>[0.37, 0.67]         | 0.5573<br>[0.23, 0.59]        | 0.4990<br>[0.33, 0.65]                | 0.5107<br>[0.18, 0.53]           | 0.6869<br>[0.54, 0.83]         | 0.5934<br>[0.41, 0.77]        | 0.7034<br>[0.55, 0.83]            | 0.5640<br>[0.36, 0.76]           |
| EfficientAD | 0.8584<br>[0.78, 0.93]         | 0.7823<br>[0.65, 0.90]        | 0.8590<br>[0.78, 0.94]            | 0.7441<br>[0.62, 0.89]           | 0.8432<br>[0.84, 0.85]        | 0.6342<br>[0.54, 0.73]         | 0.5312<br>[0.39, 0.66]        | 0.6224<br>[0.52, 0.72]                | 0.5243<br>[0.39, 0.65]           | 0.6528<br>[0.53, 0.77]         | 0.2939<br>[0.17, 0.49]        | 0.6193<br>[0.49, 0.74]            | 0.3150<br>[0.17, 0.49]           |
| AnomalyCLIP | 0.3959<br>[0.30, 0.50]         | 0.4086<br>[0.32, 0.52]        | 0.2241<br>[0.14, 0.31]            | 0.3494<br>[0.27, 0.45]           | 0.3314<br>[0.33, 0.33]        | 0.6217<br>[0.52, 0.72]         | 0.5216<br>[0.39, 0.66]        | 0.5796<br>[0.48, 0.68]                | 0.4817<br>[0.34, 0.61]           | 0.6500<br>[0.53, 0.76]         | 0.3575<br>[0.19, 0.54]        | 0.5750<br>[0.44, 0.71]            | 0.3027<br>[0.16, 0.48]           |
| Ano-NAViLa  | <b>0.9994</b><br>[1.00, 1.00]  | <b>0.9994</b><br>[1.00, 1.00] | <b>0.9976</b><br>[0.99, 1.00]     | <b>0.9978</b><br>[0.99, 1.00]    | <b>0.9681</b><br>[0.97, 0.97] | <b>0.8543</b><br>[0.78, 0.92]  | <b>0.8413</b><br>[0.75, 0.91] | 0.8092<br>[0.72, 0.90]                | <b>0.8383</b><br>[0.75, 0.91]    | <b>0.9977</b><br>[0.99, 1.00]  | <b>0.9923</b><br>[0.97, 1.00] | <b>1.0000</b><br>[1.00, 1.00]     | <b>1.0000</b><br>[1.00, 1.00]    |

Table S3. AD performance without the erosion operation on GastricLN and Camelyon16 datasets.

Amanda Askell, Pamela Mishkin, Jack Clark, et al. Learning transferable visual models from natural language supervision. In *International conference on machine learning*, pages 8748–8763. PMLR, 2021. 1

- [9] Guodong Wang, Shumin Han, Errui Ding, and Di Huang. Student-teacher feature pyramid matching for anomaly detection. *The British Machine Vision Conference (BMVC)*, 2021. 1
- [10] Julian Wyatt, Adam Leach, Sebastian M. Schmon, and Chris G. Willcocks. Anoddp: Anomaly detection with denoising diffusion probabilistic models using simplex noise. In *Proceedings of the IEEE/CVF Conference on Computer Vision and Pattern Recognition (CVPR) Workshops*, pages 650–656, 2022. 1
- [11] Jiawei Yu, Ye Zheng, Xiang Wang, Wei Li, Yushuang Wu, Rui Zhao, and Liwei Wu. Fastflow: Unsupervised anomaly detection and localization via 2d normalizing flows. *arXiv preprint arXiv:2111.07677*, 2021. 1
- [12] Sergey Zagoruyko and Nikos Komodakis. Wide residual networks. *CoRR*, abs/1605.07146, 2016. 1
- [13] Qihang Zhou, Guansong Pang, Yu Tian, Shibo He, and Jiming Chen. Anomalyclip: Object-agnostic prompt learning for zero-shot anomaly detection. In *The Twelfth International Conference on Learning Representations*, 2023. 1

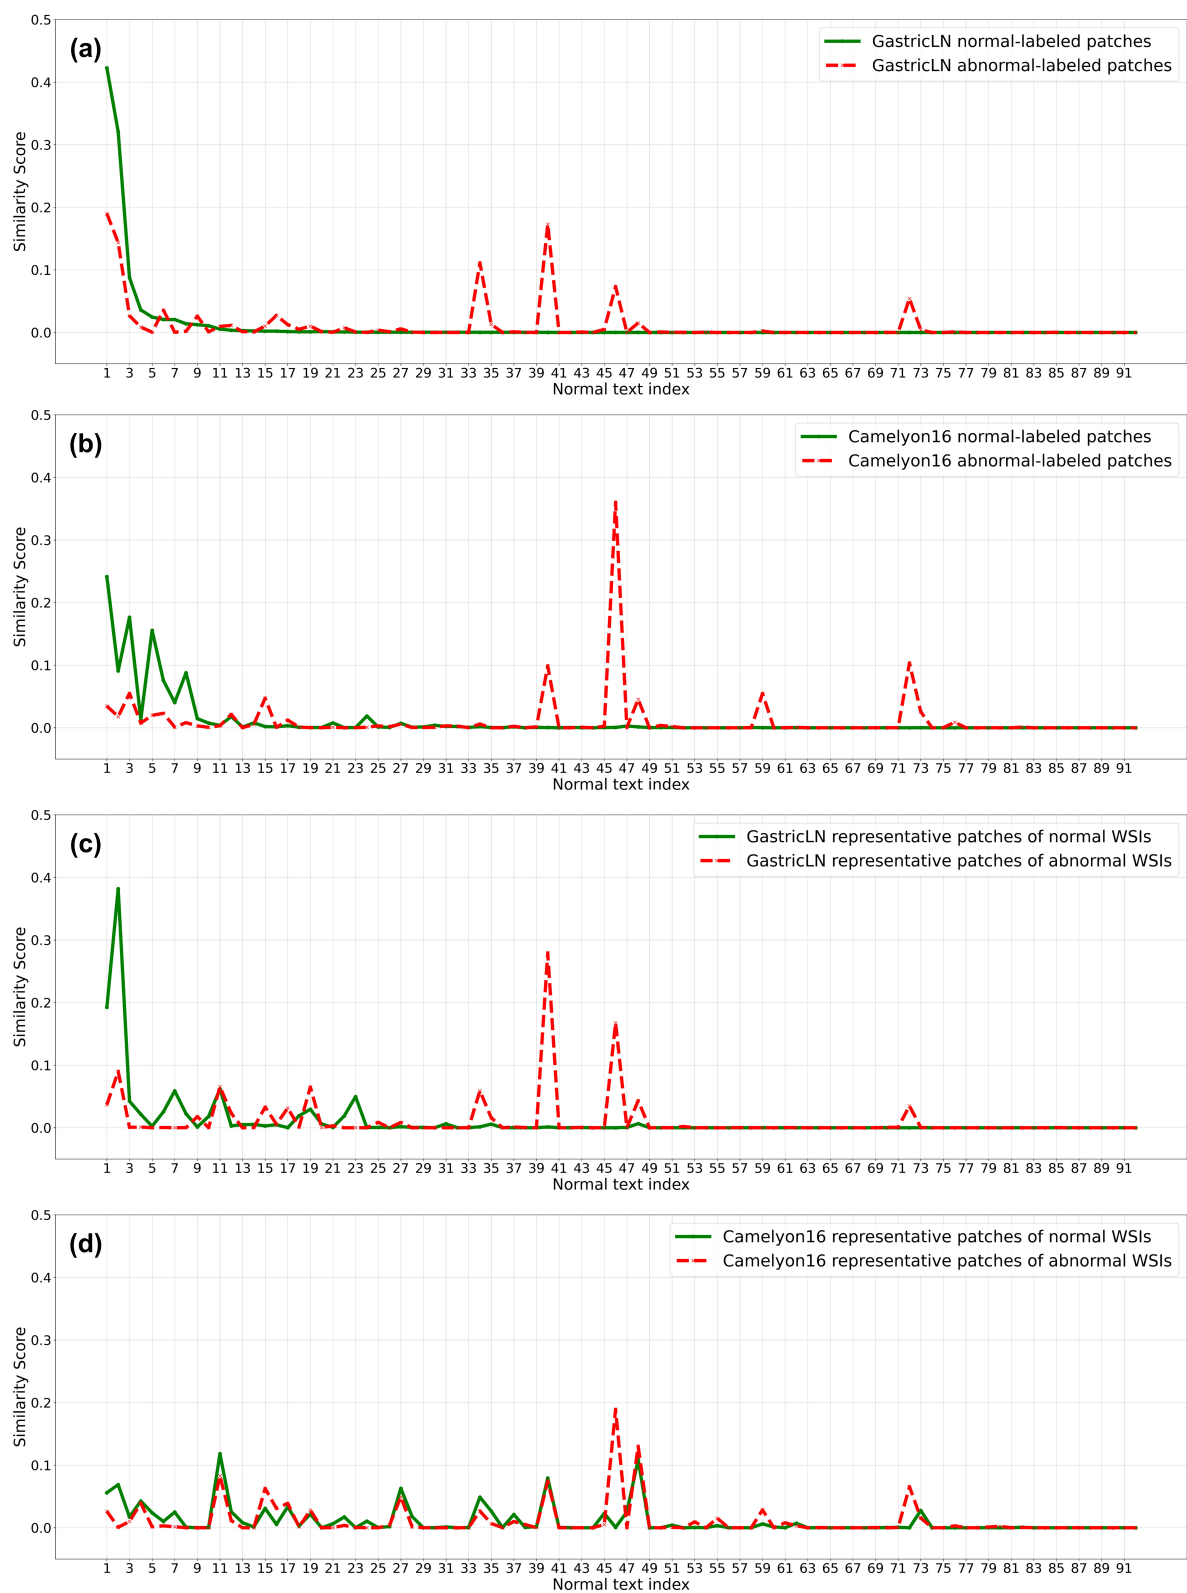

Figure S2. Distribution of image-text similarities in the normal term pool. For both GastricLN and Camelyon16 datasets, (a) and (b) are patch-level analysis results, and (c) and (d) are WSI-level analysis results.

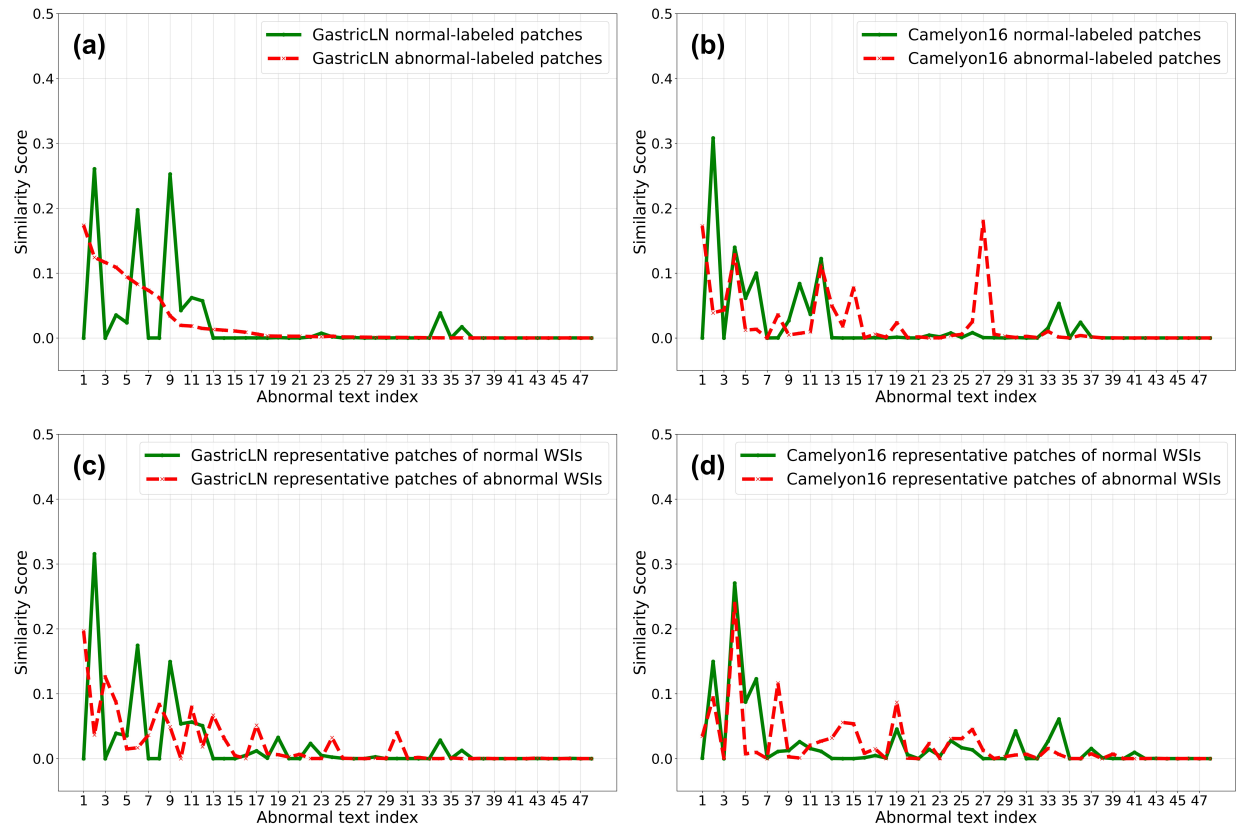

Figure S3. Distribution of image-text similarities in the abnormal term pool. For both GastricLN and Camelyon16 datasets, (a) and (b) are patch-level analysis results, and (c) and (d) are WSI-level analysis results.
